# Supplementary material
Source: PubMed Central journal article supplement (PMC4016988)
Supplement: NIHMS556312-supplement-01.pdf [file NIHMS556312-supplement-01.pdf]

**eTable 1.** ICD-9-CM Codes Used to Define Individual Complications

| Complication              | ICD-9 Code(s)                                          |
|---------------------------|--------------------------------------------------------|
| <i>Medical Group</i>      |                                                        |
| Myocardial infarction     | 410.00-410.91                                          |
| Acute renal failure       | 584                                                    |
| Venous thromboembolism    | 415.1, 451.11, 451.19, 451.2, 451.81, 453.8            |
| Pneumonia                 | 481, 482.0-482.9, 483, 484, 485, 507.0                 |
| Gastrointestinal bleed    | 530.82                                                 |
|                           | 531.00-531.21, 531.40, 531.41, 531.60, 531.61          |
|                           | 532.00-532.2, 532.40, 532.41, 532.60, 532.61           |
|                           | 533.00-533.21, 533.40, 533.41, 533.60, 533.61,         |
|                           | 534.00-534.21, 534.40, 534.41, 534.60, 534.61,         |
|                           | 535.01, 535.11, 535.21, 535.31, 535.41, 535.51, 535.61 |
|                           | 578.9                                                  |
| Pulmonary failure         | 518.81, 518.4, 518.5, 518.8                            |
|                           |                                                        |
| <i>Surgical Group</i>     |                                                        |
| Post-operative hemorrhage | 998.11, 998.12                                         |
| Surgical site infection   | 958.3, 998.3, 998.5, 998.59, 998.51                    |
